# Supplementary material for: Bardoxolone methyl analog attenuates proteinuria-induced tubular damage by modulating mitochondrial function
Source: PubMed Central journal article supplement (PMC6902727; doi:10.1096/fj.201900217r), 2019-08-30

# Supplementary Figure S2

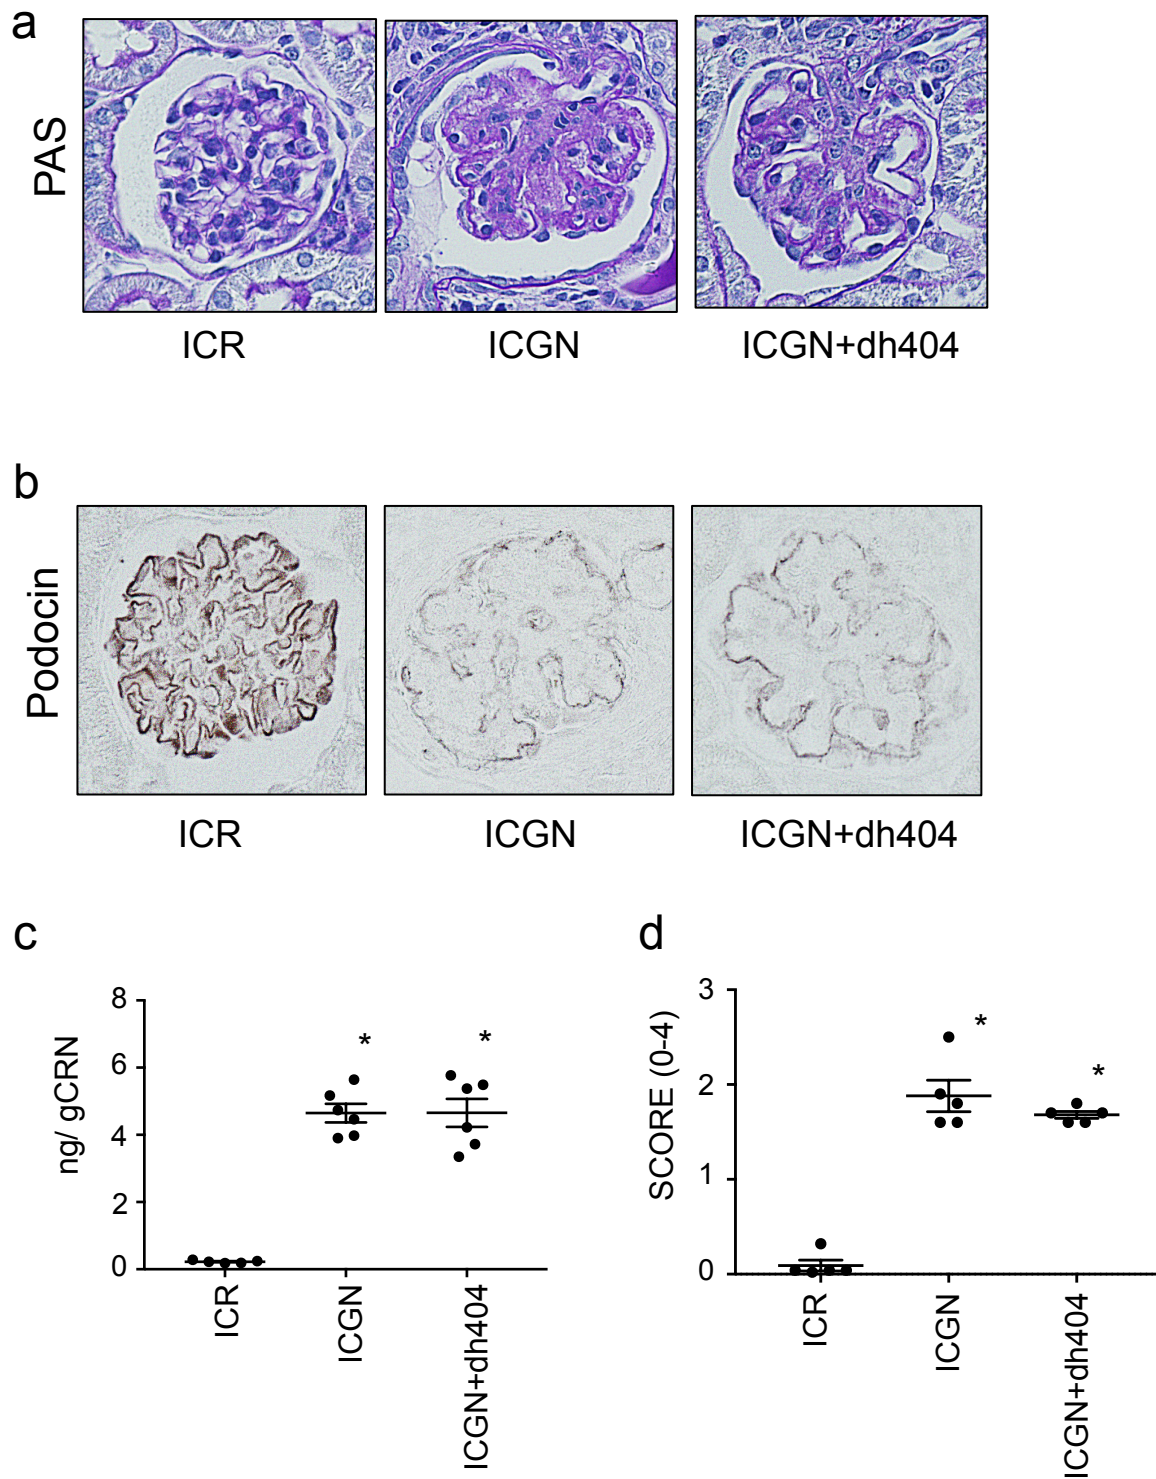

Supplement: fj.201900217R.sf2.pdf [file fj.201900217R.sf2.pdf]
